# Supplementary material for: Chromogenic detection of xylene isomers and luminogenic chemosensing of o-xylene employing a new macrocyclic cobalt complex: synthesis, and X-ray crystallographic, spectroscopic and computational studies
Source: Royal Society of Chemistry journal article supplement (doi:10.1039/d2nj04518d), 2022-01-01
Supplement: d2nj04518d1.pdf [file d2nj04518d1.pdf]

Supporting Information

**Chromogenic Detection of the xylene isomers and Luminogenic Chemosensing of the *o*-xylene Employing a New Macrocyclic Cobalt Complex: Synthesis, X-ray Crystallographic, Spectroscopic and Computational Studies**

Bahram Ghanbari<sup>a\*</sup>, Leila Asadi Mofarrah, Ali Jamjah  
Department of Chemistry, Sharif University of Technology, PO Box 11155-3516, Tehran, Iran

*\*Corresponding author:* Tel. +98 21 66165307, Fax +98 21 66005718  
*Email [ghanbari@sharif.edu](mailto:ghanbari@sharif.edu)*

**Table S1.** Materials used for sensing xylene

| scientific group                    | synthesized system                                                                        | xylene isomer                                           |
|-------------------------------------|-------------------------------------------------------------------------------------------|---------------------------------------------------------|
| Tang et al <sup>15</sup>            | TPE- $\beta$ -CD nanosheets                                                               | <i>p</i> -xylene                                        |
| Mèçabih <sup>16</sup>               | Fe, Fe–Al pillared clay                                                                   | benzene, toluene, and <i>o</i> -xylene                  |
| Zhang et al <sup>17</sup>           | pillar[5]arene (WP5)                                                                      | <i>o</i> -xylene and <i>p</i> -xylene                   |
| Lee et al <sup>18</sup>             | NiO/NiMoO <sub>4</sub> nanocomposite                                                      | <i>p</i> -xylene                                        |
| Harrison et al <sup>19</sup>        | [Co <sub>4</sub> ( <b>1</b> ) <sub>2</sub> ] <sup>8-</sup>                                | <i>p</i> -xylene                                        |
| Bej et al <sup>10</sup>             | PSP-CMERI-1<br>PSP-CMERI-2                                                                | <i>m</i> -xylene                                        |
| Yuxi Yang et Al <sup>20</sup>       | MIL-53(Al)                                                                                | <i>o</i> -xylene and <i>p</i> -xylene                   |
| Zhao et al <sup>11</sup>            | NUS-40                                                                                    | <i>o</i> -xylene                                        |
| Rosales-Vázquez et al <sup>13</sup> | [Zn <sub>2</sub> ( $\mu$ <sub>2</sub> -BDC) <sub>2</sub> (iQ) <sub>2</sub> ] <sub>∞</sub> | <i>p</i> -xylene                                        |
| Ono et al <sup>12</sup>             | NDI with a 2-benzophenone unit                                                            | toluene, <i>p</i> -xylene, 4-fluorotoluene, and anisole |
| Zhang et al <sup>21</sup>           | (P(VBC-co-MMA)-SiO <sub>2</sub> IOPC).                                                    | <i>o</i> -xylene, <i>m</i> -xylene and <i>p</i> -xylene |
| Present work                        | Co <sub>2</sub> ( <b>2py</b> ) <sub>2</sub> Cl <sub>4</sub> . DMF                         | <i>o</i> -xylene, <i>m</i> -xylene and <i>p</i> -xylene |

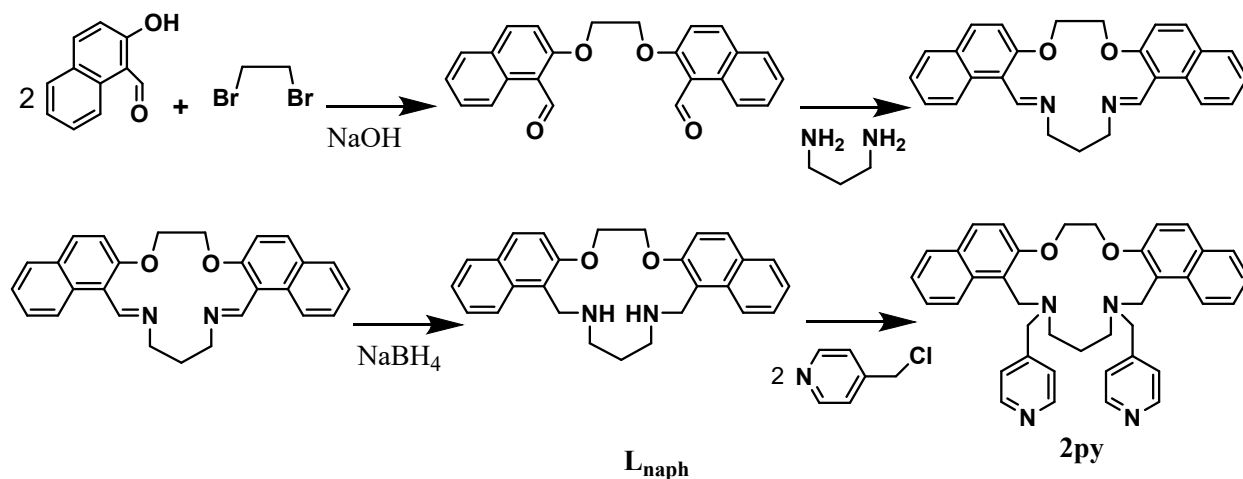**Figure S1** The synthetic route of new ligand **2py**

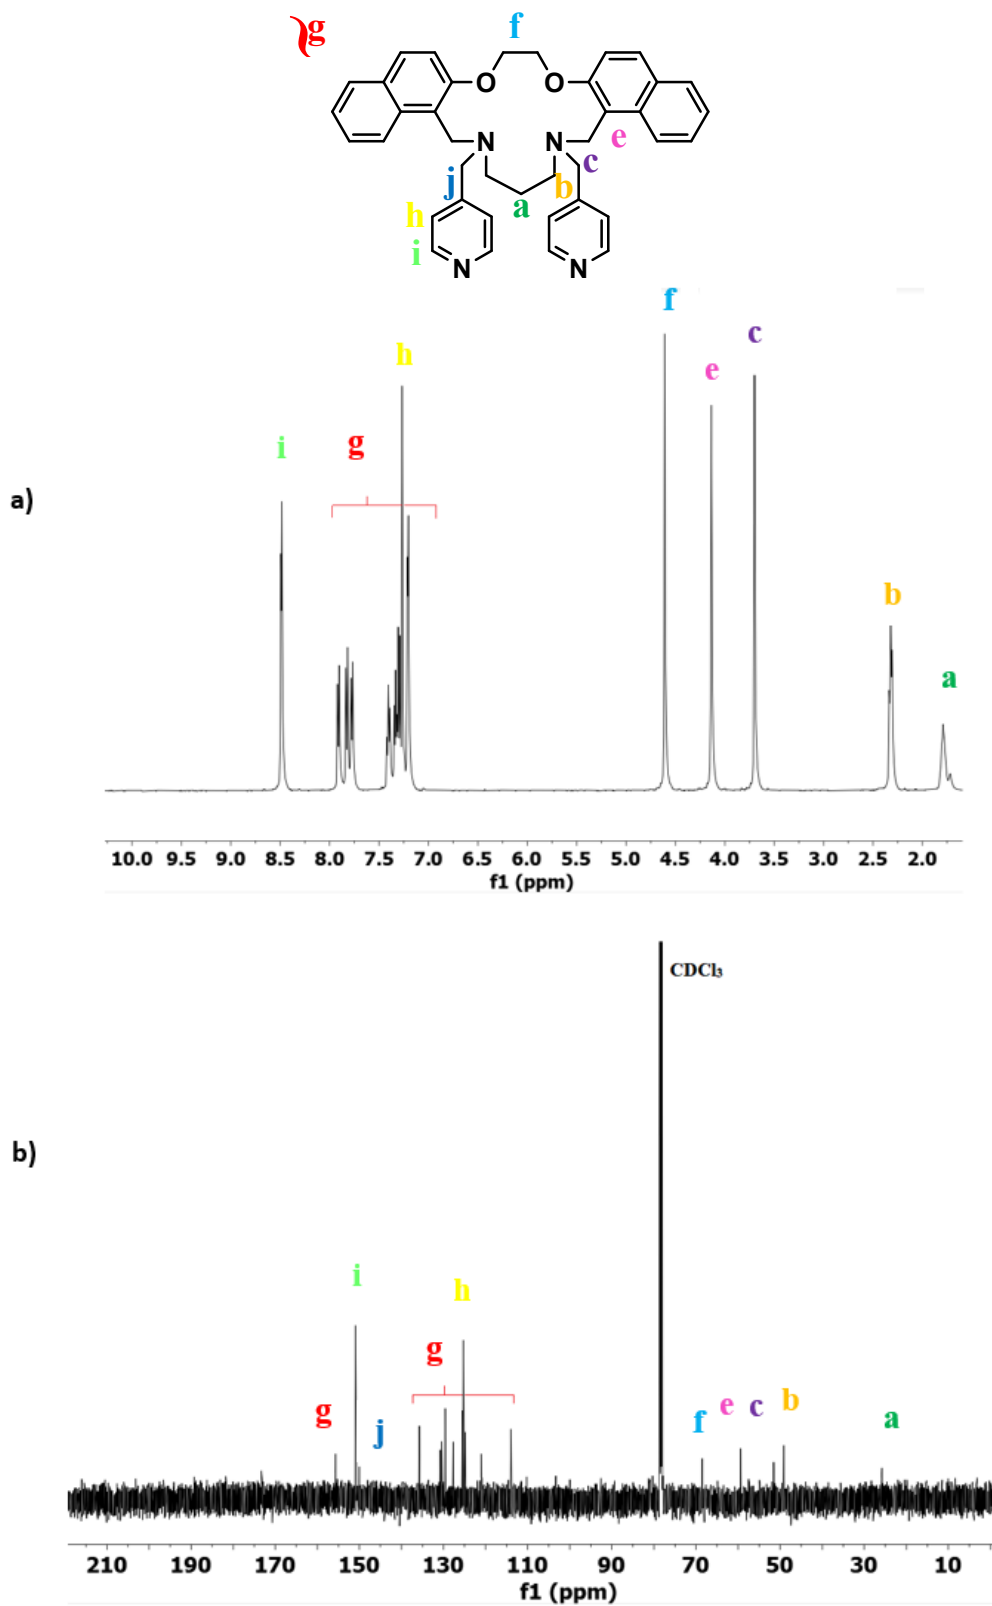

Figure S2 a)  $^1\text{H}$  NMR and b)  $^{13}\text{C}$  NMR spectra of 2py along with assignment

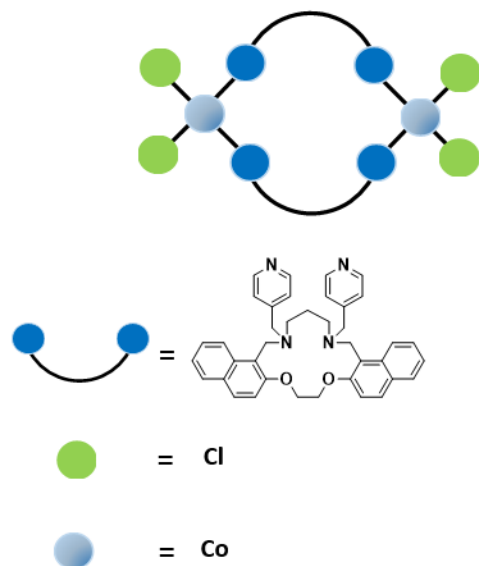

**Figure S3** Illustrative representation for the formation of  $\text{Co}_2(\mathbf{2py})_2\text{Cl}_4$  dimer

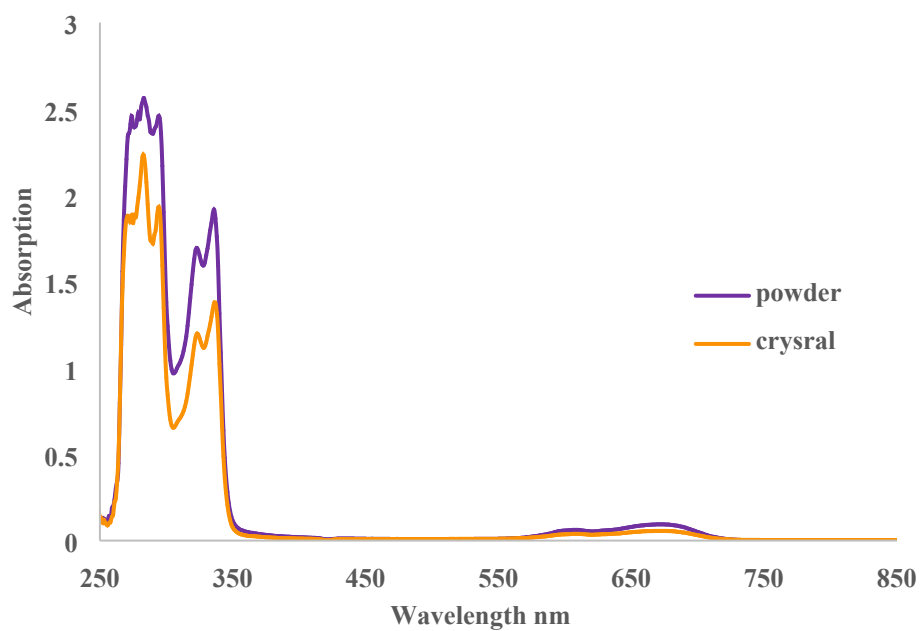

**Figure S4** The UV-vis spectra of  $\text{Co}_2(\mathbf{2py})_2\text{Cl}_4$  powder and crystal in DMF at 298K

**Table S2** The data collection, structure refinement and the crystal data for Co<sub>2</sub>(**2py**)<sub>2</sub>Cl<sub>4</sub>·DMF

| Compound                                                                      | Co <sub>2</sub> ( <b>2py</b> ) <sub>2</sub> Cl <sub>4</sub> ·DMF                                                                                                       |
|-------------------------------------------------------------------------------|------------------------------------------------------------------------------------------------------------------------------------------------------------------------|
| Empirical formula                                                             | C <sub>78</sub> H <sub>76</sub> Cl <sub>4</sub> Co <sub>2</sub> N <sub>8</sub> O <sub>4</sub> ·2(C <sub>1.5</sub> H <sub>3.5</sub> N <sub>0.5</sub> O <sub>0.5</sub> ) |
| $M_r$                                                                         | 1522.22                                                                                                                                                                |
| Temperature (K)                                                               | 290                                                                                                                                                                    |
| Wavelength (Å)                                                                | 0.7073                                                                                                                                                                 |
| Crystal system                                                                | Triclinic                                                                                                                                                              |
| Space group                                                                   | P $\bar{1}$                                                                                                                                                            |
| a, b, c (Å)                                                                   | 9.869(2), 10.238 (2), 18.824 (4)                                                                                                                                       |
| $\alpha$ , $\beta$ , $\gamma$ (deg)                                           | 90.35(3), 94.07(3), 94.06(3)                                                                                                                                           |
| Volume (Å <sup>3</sup> )                                                      | 1892.2(7)                                                                                                                                                              |
| Z                                                                             | 1                                                                                                                                                                      |
| Radiation type                                                                | Mo K $\alpha$                                                                                                                                                          |
| Crystal size (mm)                                                             | 0.4 × 0.3 × 0.25                                                                                                                                                       |
| $T_{\min}$ , $T_{\max}$                                                       | 0.991, 1.011                                                                                                                                                           |
| ( $\sin \theta/\lambda$ ) <sub>max</sub> (Å <sup>-1</sup> )                   | 0.595                                                                                                                                                                  |
| No. of measured, independent and observed<br>[ $I > 2\sigma(I)$ ] reflections | 11825, 6053, 5647                                                                                                                                                      |
| $R_{\text{int}}$                                                              | 0.020                                                                                                                                                                  |
| $D_{\text{calc}}$ (Mg/m <sup>3</sup> )                                        | 1.336                                                                                                                                                                  |
| $\mu$ (mm <sup>-1</sup> )                                                     | 0.637                                                                                                                                                                  |
| F(000)                                                                        | 794.0                                                                                                                                                                  |
| $R[F^2 > 2\sigma(F^2)]$ , $wR(F^2)$ , $S$                                     | 0.041, 0.114, 1.08                                                                                                                                                     |
| No. of reflections                                                            | 6053                                                                                                                                                                   |
| No. of parameters                                                             | 470                                                                                                                                                                    |
| No. of restraints                                                             | 17                                                                                                                                                                     |
| H-atom treatment                                                              | H-atom parameters constrained                                                                                                                                          |
| $\Delta\rho_{\text{max}}$ , $\Delta\rho_{\text{min}}$ (e Å <sup>-3</sup> )    | 0.29, -0.23                                                                                                                                                            |

**Table S3** The Co–N and Co–Cl bond lengths (Å) and angles (°) in Co<sub>2</sub>(**2py**)<sub>2</sub>Cl<sub>4</sub>·DMF

|                    |           |
|--------------------|-----------|
| Co(3)-Cl(1)        | 2.223(1)  |
| Co(3)-Cl(2)        | 2.241(1)  |
| Co(3)-N(7)         | 2.309(2)  |
| Co(3)-N(6)         | 2.036(2)  |
| Cl(1)-Co(3)-Cl(2)  | 120.06(3) |
| N(6)-Co(3)-N(7)    | 104.08(8) |
| N(6)-Co(3)- Cl(2)  | 106.24(6) |
| N(6)-Co(3)- Cl(1)  | 111.46(6) |
| N(7)- Co(3)- Cl(2) | 108.68(6) |
| N(7)- Co(3)- Cl(1) | 105.21(6) |

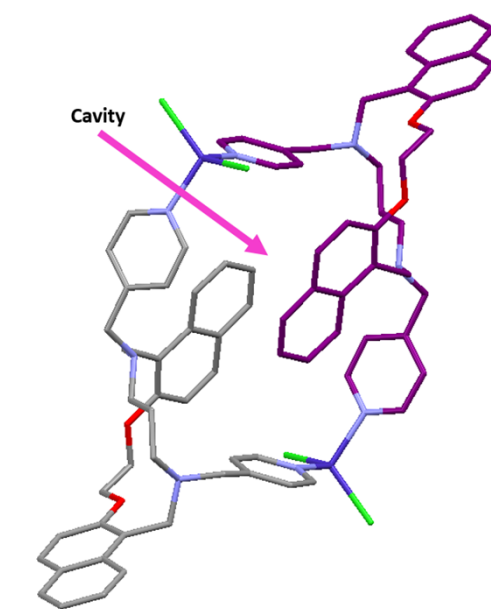

**Figure S5** The representation of the cavity of the Co<sub>2</sub>(**2py**)<sub>2</sub>Cl<sub>4</sub>·DMF (hydrogen atoms and DMF molecule were omitted for clarity)

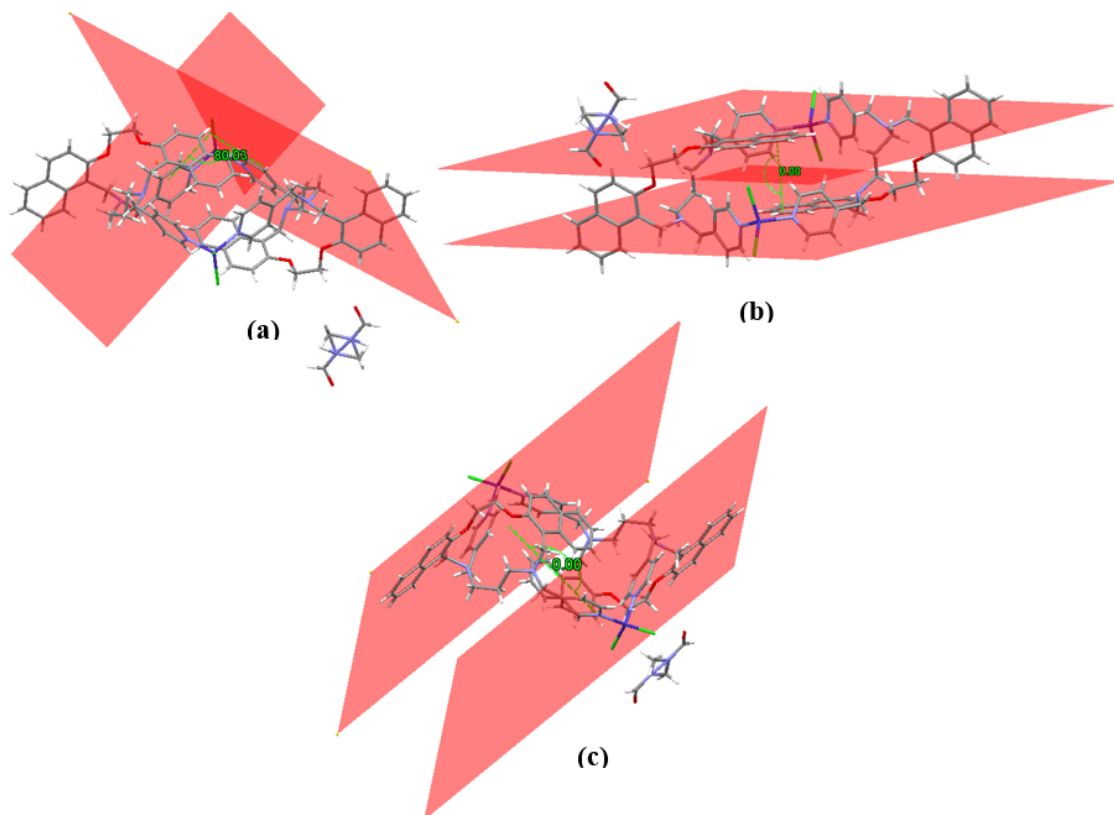

**Figure S6** a) The dihedral angle between two pyridine moieties, b) The dihedral angle between two naphthalene rings oriented the inward of the molecule, c) The dihedral angles between two naphthalene rings oriented outward of the molecule

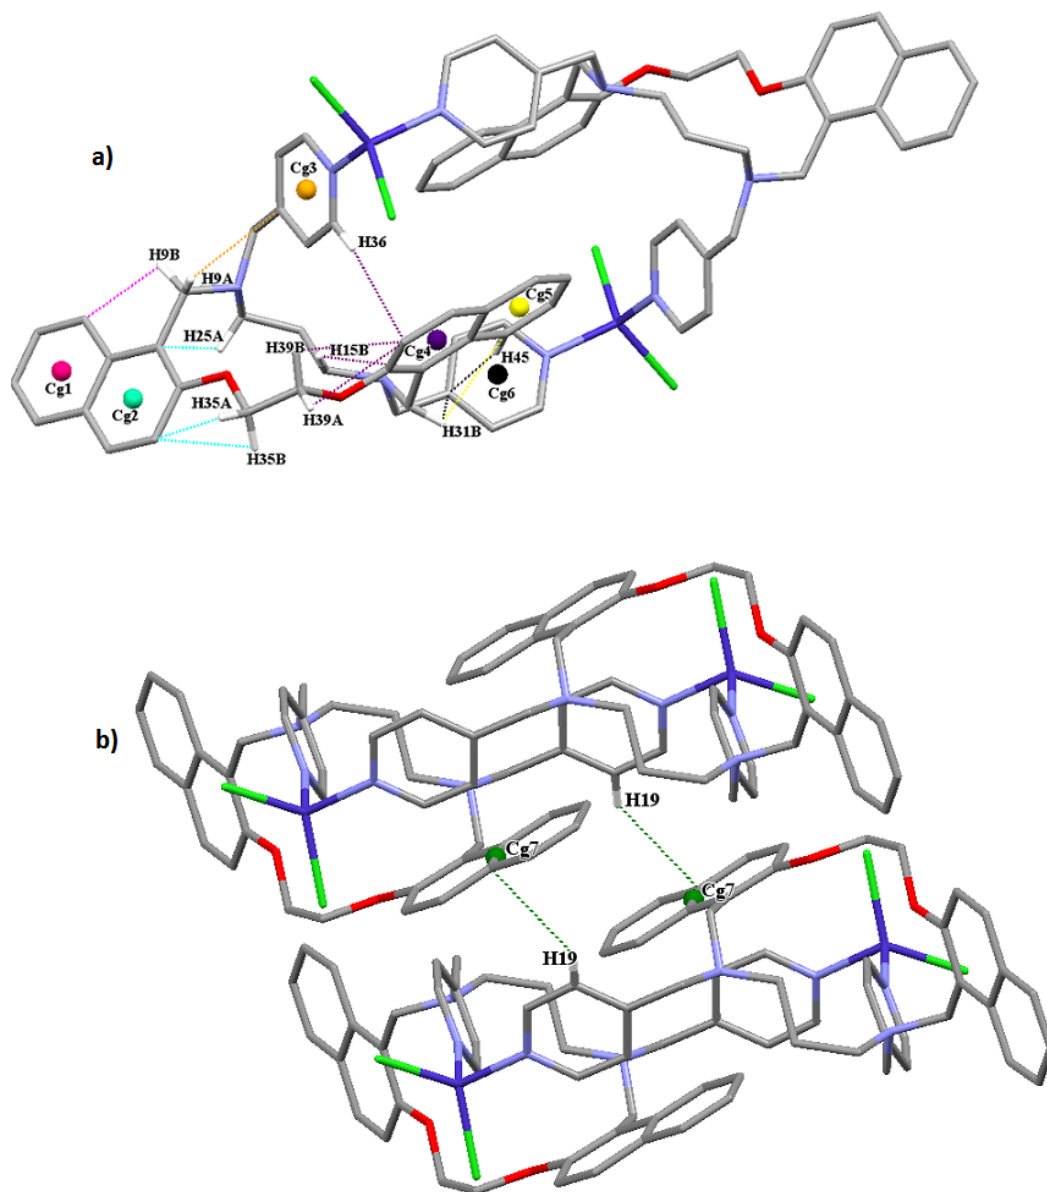

**Figure S7** The representation of the (a) intramolecular C–H...Cg interactions b) intermolecular C–H...Cg interactions in  $\text{Co}_2(\text{2py})_2\text{Cl}_4 \cdot \text{DMF}$  (only relevant hydrogen atoms are shown and the interactions with one Cg are displayed with the same dash line color for clarifying)



**Table S4** Weak interactions data ( $^{\circ}$ ,  $\text{\AA}$ ) in  $\text{Co}_2(\mathbf{2py})_2\text{Cl}_4$ . DMF, Cg stands for (the middle point of) the six and ten member rings

| Analysis of Potential Hydrogen Bonds              |      |               |                 |               |              |                |
|---------------------------------------------------|------|---------------|-----------------|---------------|--------------|----------------|
| D                                                 | H    | A             | D–H             | H $\cdots$ A  | D $\cdots$ A | D–H $\cdots$ A |
| C40                                               | H40  | O4            | 0.93            | 2.542         | 3.438        | 161.84         |
| C15                                               | H15B | O4            | 0.97            | 2.597         | 3.315        | 130.94         |
| C31                                               | H31A | O4            | 0.97            | 2.380         | 2.791        | 104.88         |
| C35                                               | H35A | O3            | 0.97            | 2.641         | 3.550        | 156.16         |
| C9                                                | H9A  | O1            | 0.97            | 2.556         | 2.723        | 89.36          |
| D                                                 | H    | A             | D–H             | H $\cdots$ A  | D $\cdots$ A | D–H $\cdots$ A |
| C15                                               | H15B | N2            | 0.97            | 2.622         | 3.009        | 104.07         |
| C18                                               | H18  | N2            | 0.93            | 2.564         | 2.874        | 99.92          |
| Analysis of X–H $\cdots$ C Interactions           |      |               |                 |               |              |                |
| C                                                 | H    | X             | C–H             | H $\cdots$ X  | C $\cdots$ X | C–H $\cdots$ X |
| C14                                               | H14B | Cl1           | 0.97            | 2.746         | 3.612        | 149.11         |
| C39                                               | H39A | Cl1           | 0.97            | 2.713         | 3.589        | 150.52         |
| C8                                                | H8A  | Cl2           | 0.97            | 2.934         | 3.810        | 150.82         |
| Analysis of C–H $\cdots$ Cg(Pi-Ring) Interactions |      |               |                 |               |              |                |
| C–H                                               | Cg   | H $\cdots$ Cg | C–H $\cdots$ Cg | C $\cdots$ Cg | C–H, Pi      |                |
| C9 –H9B                                           | Cg1  | 3.688         | 94.88           | 3.892         | 108.79       |                |
| C35 –H35A                                         | Cg2  | 3.782         | 79.25           | 3.674         | 79.61        |                |
| C35 –H35B                                         | Cg2  | 3.739         | 78.67           | 3.674         | 87.43        |                |
| C25 –H25A                                         | Cg2  | 3.213         | 134.53          | 3.954         | 109.95       |                |
| C9 –H9A                                           | Cg3  | 3.673         | 117.68          | 4.212         | 97.73        |                |
| C36 –H36                                          | Cg4  | 3.212         | 126.46          | 3.839         | 147.05       |                |
| C39 –H39A                                         | Cg4  | 3.914         | 69.21           | 3.683         | 77.61        |                |
| C39 –H39B                                         | Cg4  | 3.641         | 84.84           | 3.683         | 88.56        |                |
| C15 –H15B                                         | Cg4  | 3.382         | 120.32          | 4.394         | 103.56       |                |
| C31 –H31B                                         | Cg5  | 3.794         | 88.75           | 3.852         | 95.22        |                |
| C31 –H31B                                         | Cg6  | 3.750         | 115.06          | 4.252         | 102.43       |                |
| C45 –H45                                          | Cg6  | 2.935         | 156.85          | 3.808         | 167.97       |                |
| C19 –H19                                          | Cg7  | 2.903         | 131.14          | 3.584         | 137.30       |                |

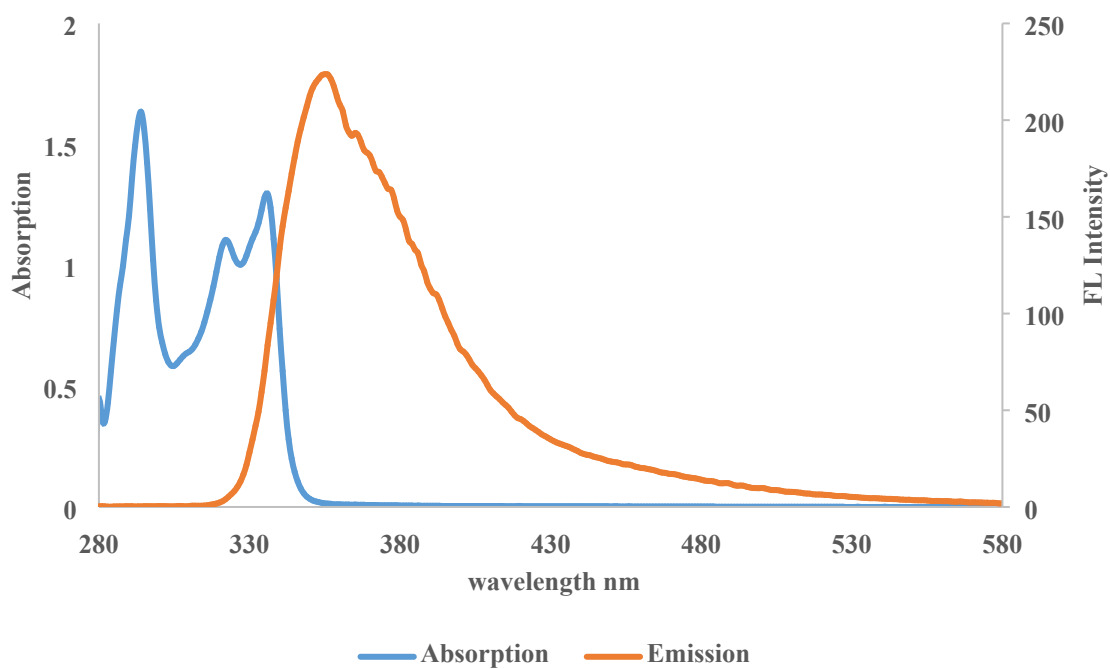

**Figure S8** The absorption (blue line) and FL bands (orange line) of **2py** in ethanol at 298K ( $\lambda_{\text{excitation}}$  340 nm)

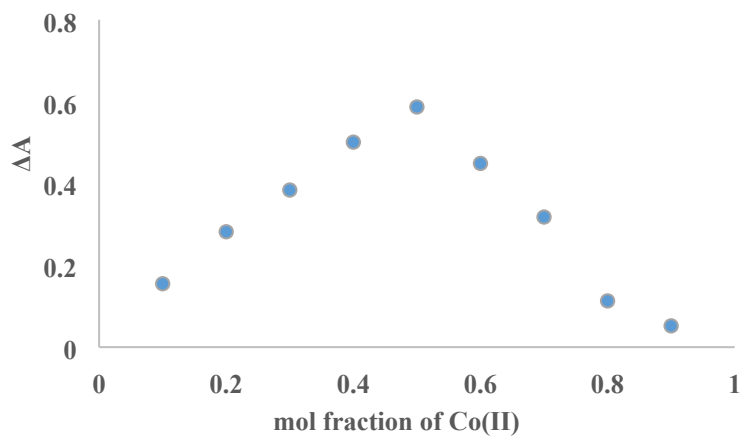

**Figure S9** The Job's plots for Co(II)/2py

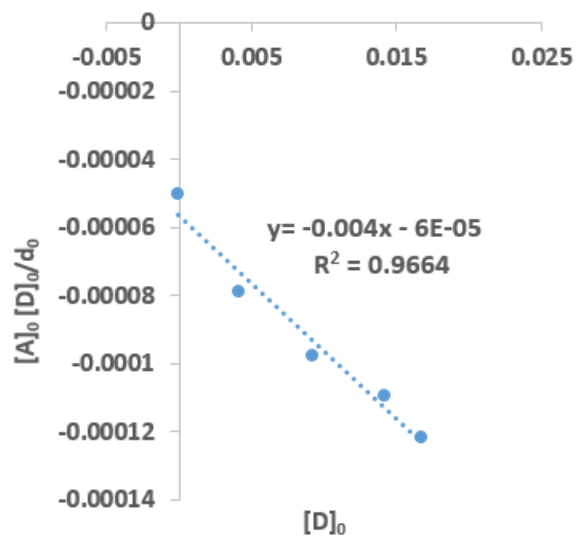

Figure S10 The Benesi-Hildebrand plot of Co(II)/2py in DMF at 298K

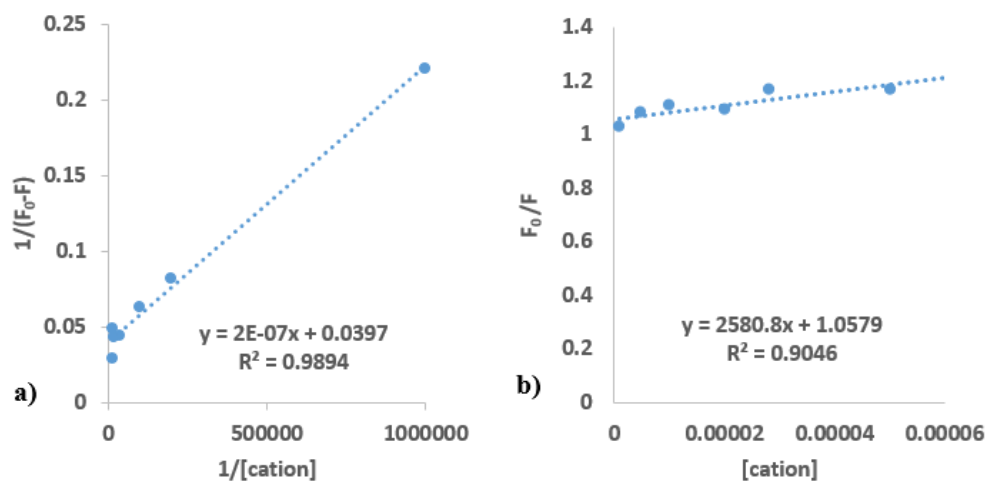

Figure S11 a) The Benesi-Hildebrand plot of Co(II)/2py and b) The Stern-Volmer plot of Co(II)/2py<sub>naph</sub>

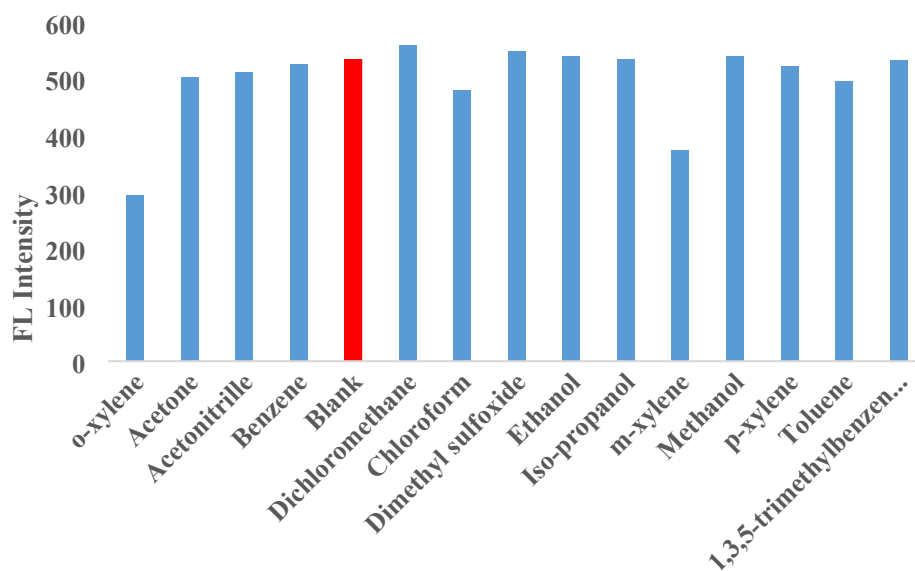

**Figure S12** The FL emission intensities of  $\text{Co}_2(\mathbf{2py})_2\text{Cl}_4$  in different organic solvent/DMF mixtures, see the text for description.

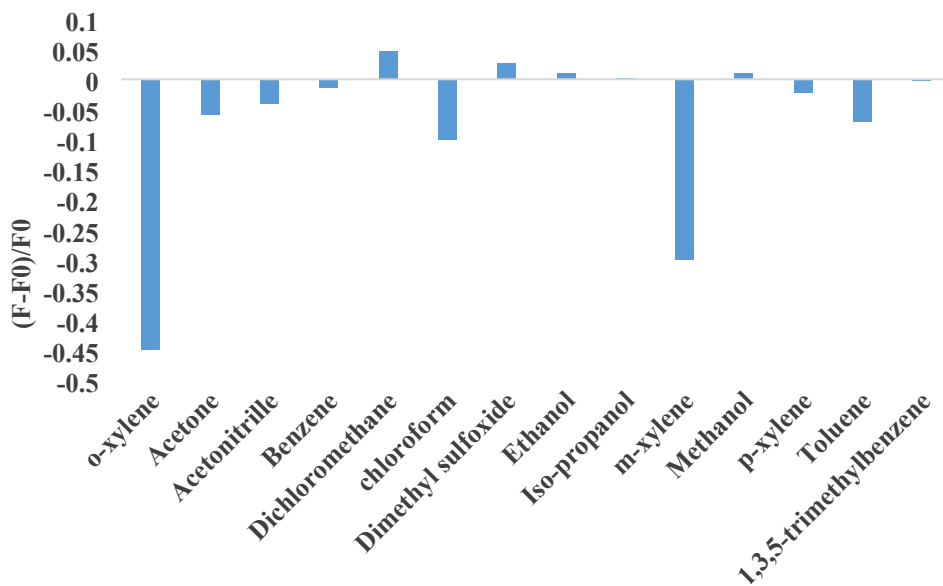

**Figure S13** The FEF diagram of  $\text{Co}_2(\mathbf{2py})_2\text{Cl}_4$  in DMF/solvent mixtures

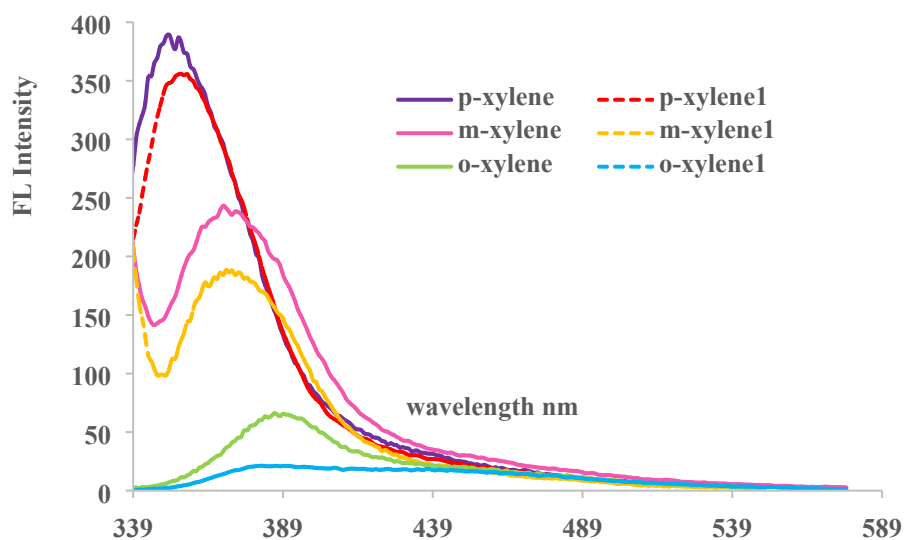

**Figure S14** Comparative FL spectra of  $\text{Co}_2(\mathbf{2py})_2\text{Cl}_4$  ( $0.33 \text{ mg mL}^{-1}$ ), dispersed in xylene isomers on day 1 (*o*-xylene, *m*-xylene, and *p*-xylene) versus 1 week (*o*-xylene1, *m*-xylene1, and *p*-xylene1)

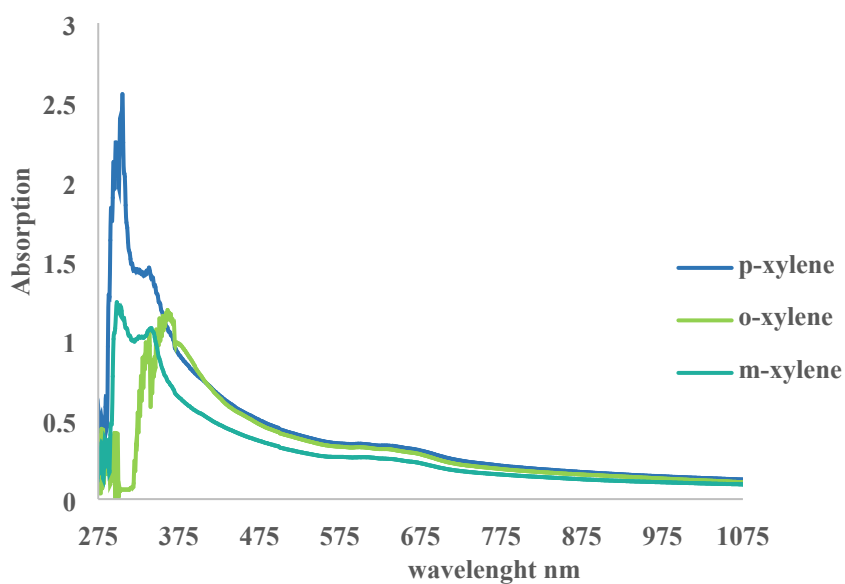

**Figure S15** The UV-vis of  $\text{Co}_2(\mathbf{2py})_2\text{Cl}_4$  ( $0.033 \text{ mg mL}^{-1}$ ) dispersed in *o*-, *m*- and *p*-xylene isomers

**Table S5** The  $K_{FL}$  and  $K_{SV}$  of  $\text{Co}_2(\mathbf{2py})_2\text{Cl}_4$  ( $1.4 \times 10^{-5}$  M) with xylene isomers in DMF at 298 K

| $K_i$ value ( $\text{M}^{-1}$ ) | <i>o</i> -xylene                  | <i>m</i> -xylene               | <i>p</i> -xylene                |
|---------------------------------|-----------------------------------|--------------------------------|---------------------------------|
| $K_{FL}$                        | $1.700 \times 10^6 (\pm 7715.79)$ | $8.800 \times 10^5 (\pm 5874)$ | $5.125 \times 10^3 (\pm 51.25)$ |
| $K_{SV}$                        | $8.657 \times 10^2 (\pm 19.49)$   | $4.615 \times 10^2 (\pm 6.84)$ | $1.790 \times 10^3 (\pm 14.45)$ |

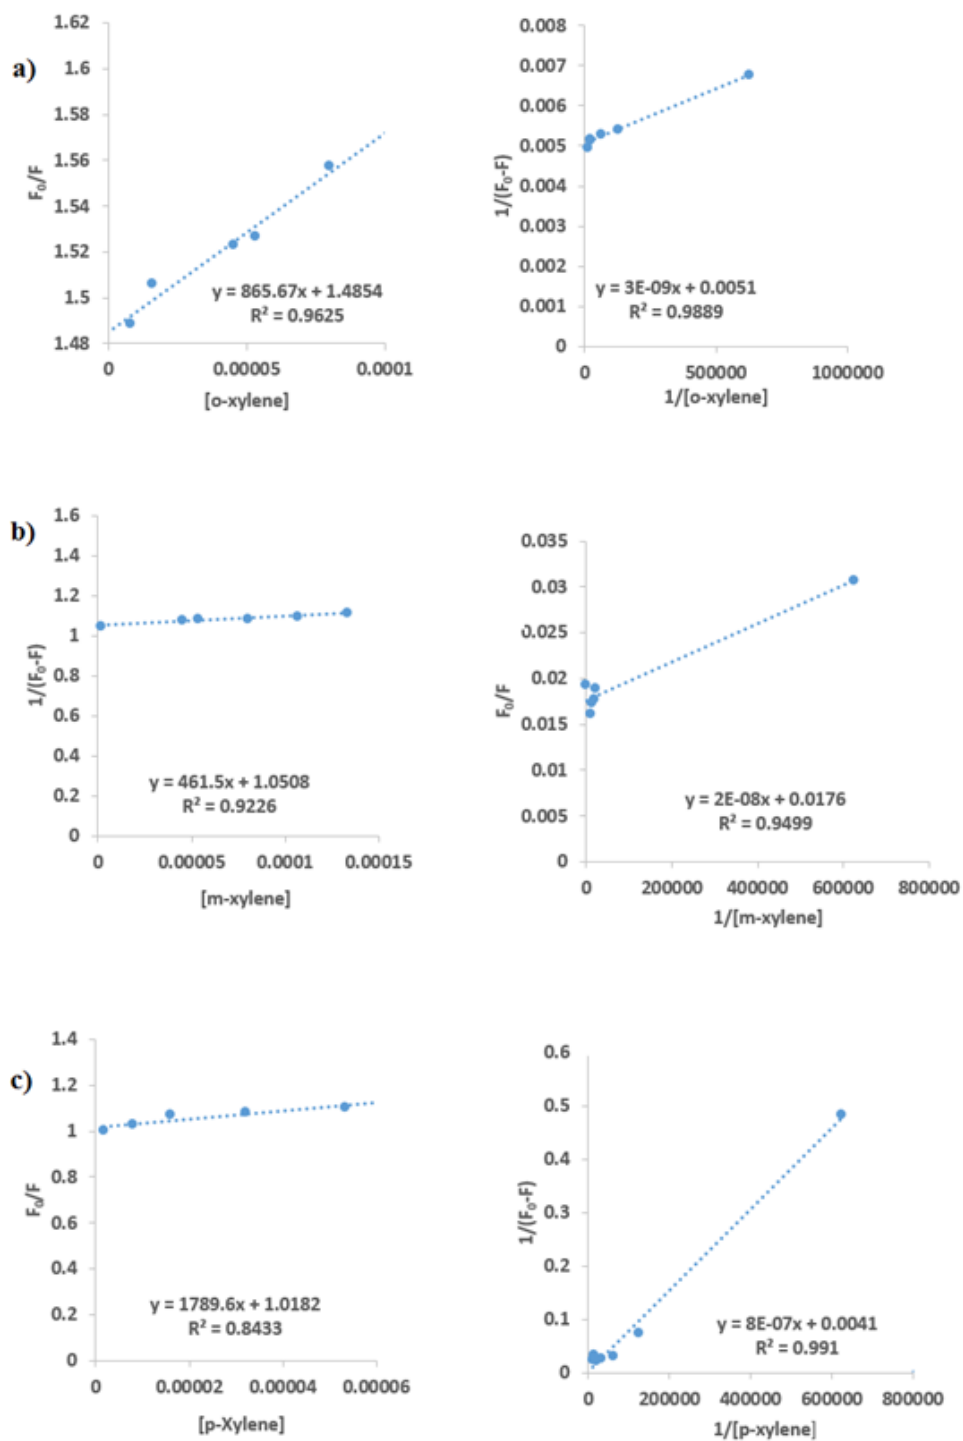

**Figure S16** The Stern-Volmer plots (left column) and the Benesi-Hildbrand plots (right column) of  $\text{Co}_2(\mathbf{2py})_2\text{Cl}_4$  / *o*-, *m*-, *p*-xylene

**Table S6** The detected species by GC-Mass with their corresponding retention time (RT) (ox-2, mx-2,px-2 refers to the xylene after catalytic treatment)

| <b><i>o</i>-xylene</b> |                                   |
|------------------------|-----------------------------------|
| retention time (min)   | compound                          |
| 3.62-5.01              | xylene                            |
| 5.66                   | methylethyl-benzene               |
| 15.72                  | 2-methyl-benzaldehyde             |
| 17.03                  | 2-methyl-benzenemethanol          |
| 17.81                  | 2-methyl-benzaldehyde             |
| <b>ox-2</b>            |                                   |
| 3.55-4.48              | xylene                            |
| 5.43                   | methylethyl- benzene              |
| 15.77                  | 2-methyl-benzaldehyde             |
| 17.35                  | 1-methoxymethyl-2-methylbenzene   |
| 17.96                  | 2-methyl-benzoic acid             |
| 17.08                  | 2-methyl-benzenemethanol          |
| <b><i>m</i>-xylene</b> |                                   |
| 3.29                   | 1,3-bis(3-phenoxyphenoxy)-benzene |
| 4.11                   | ethyl-benzene                     |
| 4.68 and 5.25          | xylene                            |
| <b>mx-2</b>            |                                   |
| 4.21 and 4.32          | ethyl-benzene                     |
| 4.64-5.73              | xylene                            |
| 13.29                  | 4-methyl-benzaldehyde             |
| <b><i>p</i>-xylene</b> |                                   |
| Retention time (min)   | Compound                          |
| 3.86-4.42              | xylene                            |
| <b>px-2</b>            |                                   |
| 3.75-4.56              | xylene                            |



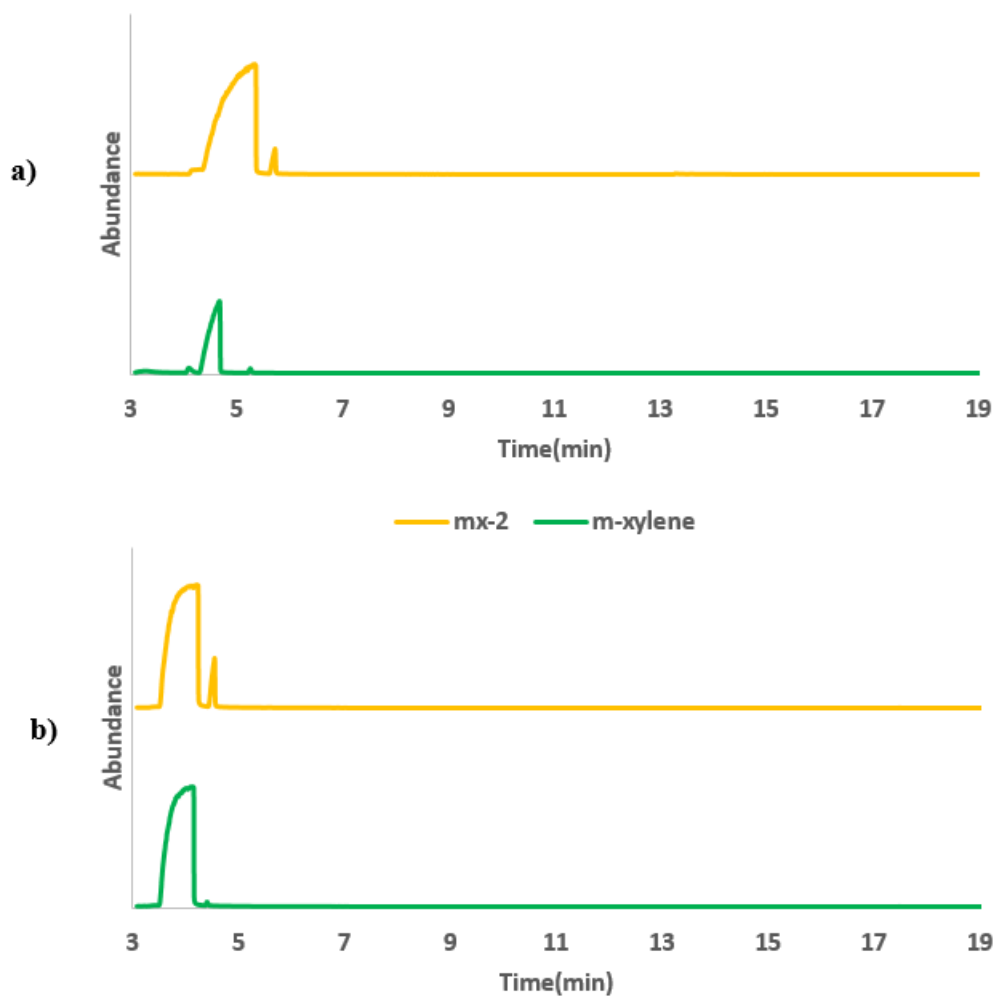

**Figure S17** a) The GC-mass diagrams of: (a) *m*-xylene and mx-2 before and after catalytic treatment with  $\text{Co}_2(\mathbf{2py})_2\text{Cl}_4$ , respectively; b) *p*-xylene and px-2 before and after catalytic treatment with  $\text{Co}_2(\mathbf{2py})_2\text{Cl}_4$ , respectively.

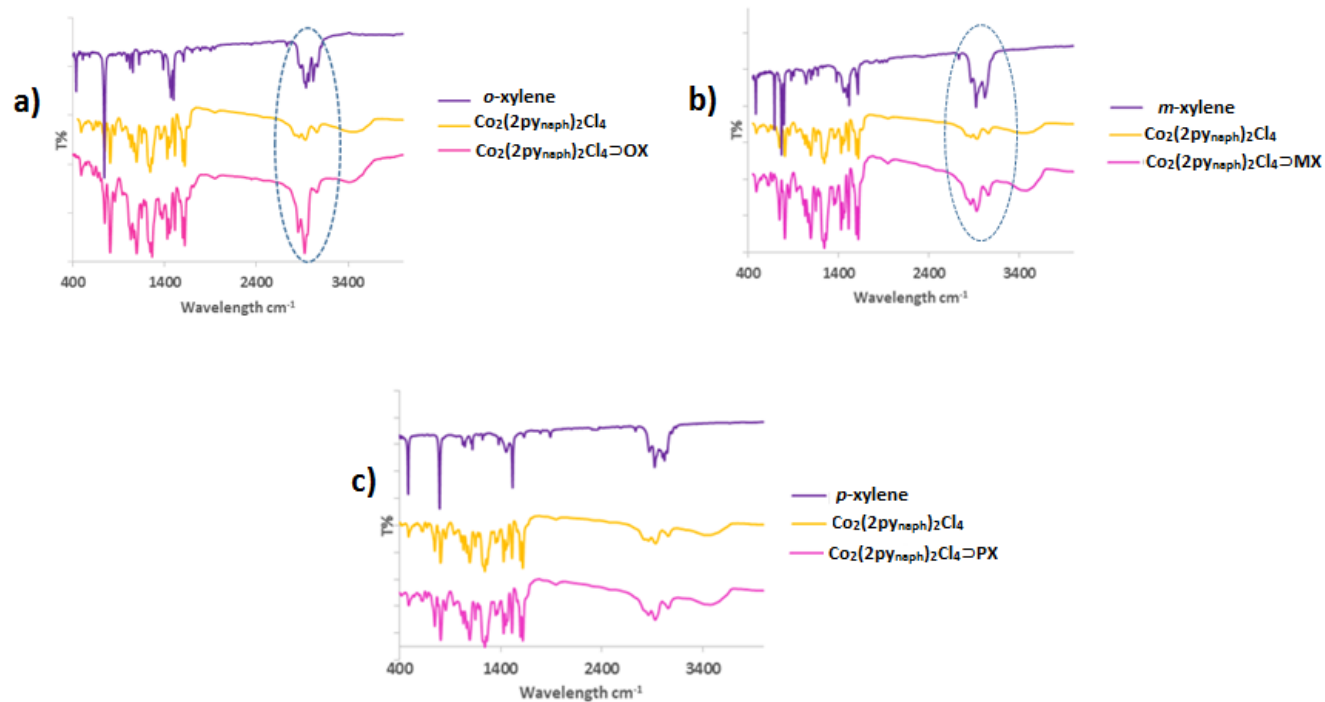

**Figure S18** The FT-IR spectra of  $\text{Co}_2(\text{2py})_2\text{Cl}_4$  and a) *o*-xylene and  $\text{Co}_2(\text{2py})_2\text{Cl}_4 \supset \text{OX}$ , b) *m*-xylene and  $\text{Co}_2(\text{2py})_2\text{Cl}_4 \supset \text{MX}$ , c) *p*-xylene and  $\text{Co}_2(\text{2py})_2\text{Cl}_4 \supset \text{PX}$ .

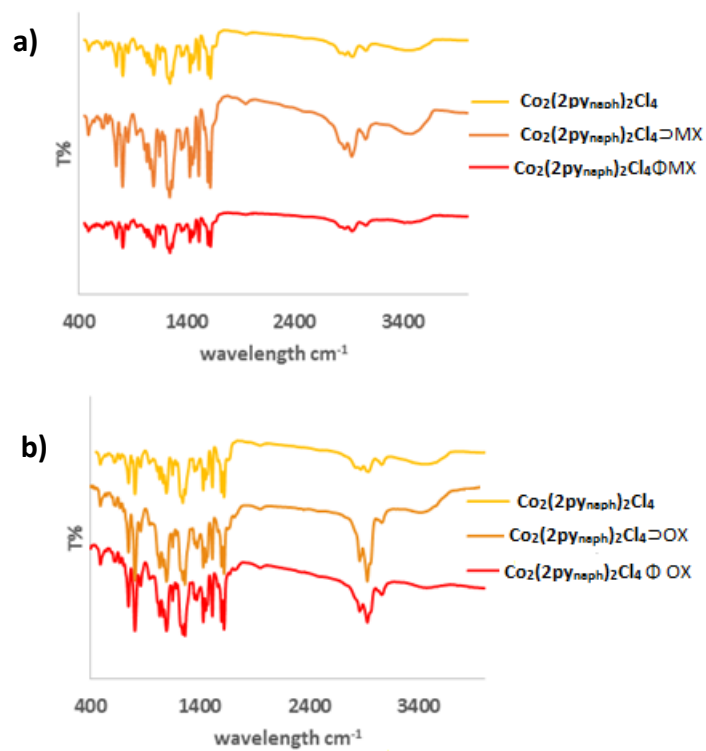

**Figure S19.** The FT-IR spectra of a)  $\text{Co}_2(\mathbf{2py})_2\text{Cl}_4$  along with: a)  $\text{Co}_2(\mathbf{2py})_2\text{Cl}_4 \supset \text{MX}$ , and  $\text{Co}_2(\mathbf{2py})_2\text{Cl}_4 \oplus \text{MX}$ . ( $\text{Co}_2(\mathbf{2py})_2\text{Cl}_4 \oplus \text{OX}$  and  $\text{Co}_2(\mathbf{2py})_2\text{Cl}_4 \oplus \text{MX}$  refer to  $\text{Co}_2(\mathbf{2py})_2\text{Cl}_4 \supset \text{OX}$  and  $\text{Co}_2(\mathbf{2py})_2\text{Cl}_4 \supset \text{MX}$ , b)  $\text{Co}_2(\mathbf{2py})_2\text{Cl}_4 \supset \text{OX}$  and  $\text{Co}_2(\mathbf{2py})_2\text{Cl}_4 \oplus \text{OX}$ , respectively after exposure to the vacuum at 333K for 8h to release xylene).

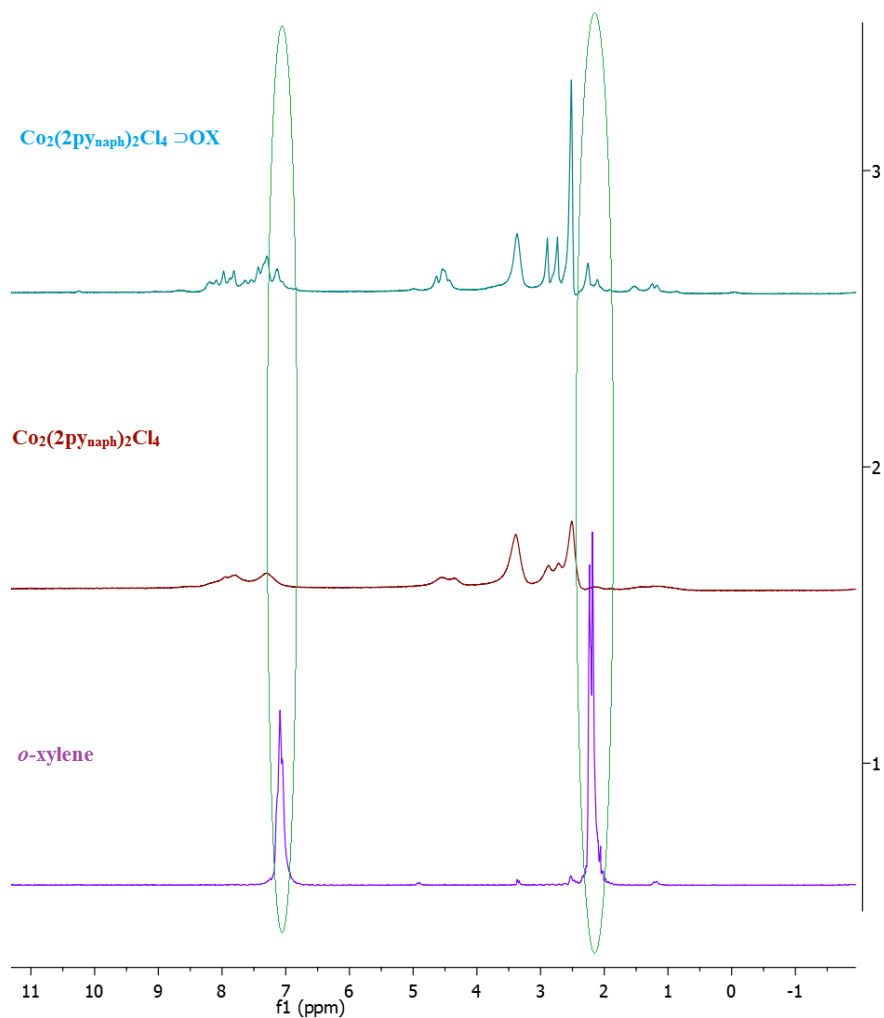

**Figure S20** <sup>1</sup>H NMR spectra of: *o*-xylene,  $\text{Co}_2(\mathbf{2py})_2\text{Cl}_4$ , and  $\text{Co}_2(\mathbf{2py})_2\text{Cl}_4 \text{ OX}$  in DMSO at RT

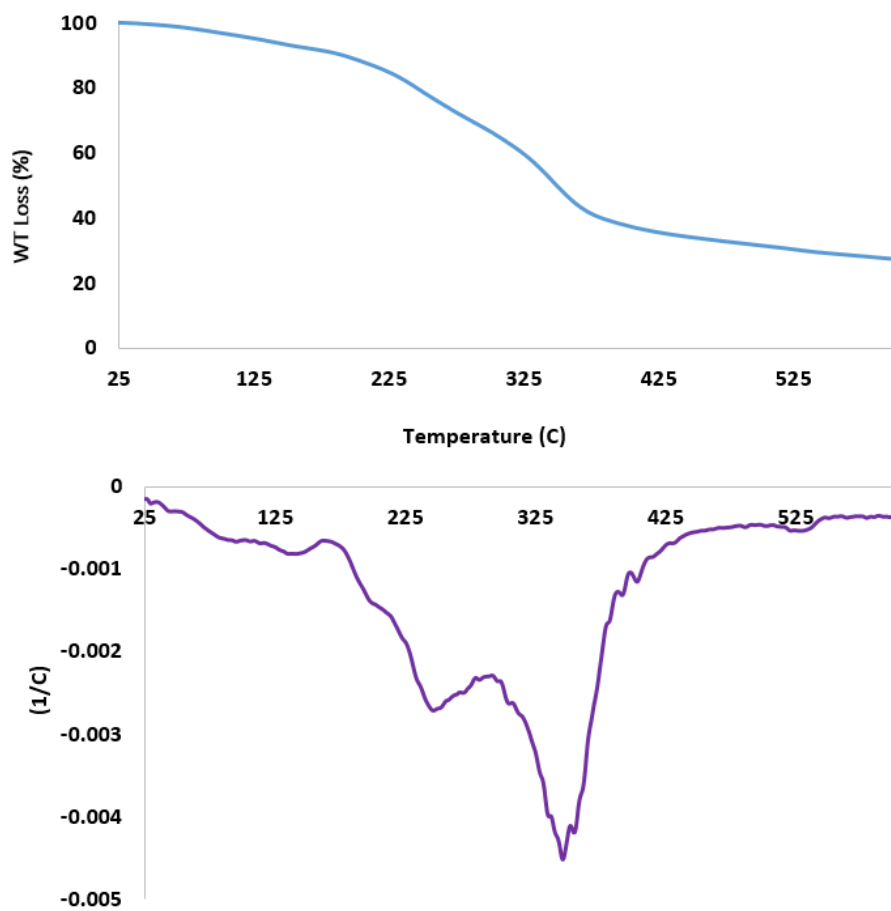

Figure S21 The TGA (top) and DTG (bottom) diagrams of  $\text{Co}_2(\mathbf{2py})_2\text{Cl}_4 \cdot \text{OX}$

**Table S7** The Cartesian coordinates of Co<sub>2</sub>(**2py**)<sub>2</sub>Cl<sub>4</sub> in DMF

| In DMF |             |             |             |    |             |             |             |
|--------|-------------|-------------|-------------|----|-------------|-------------|-------------|
|        | X           | Y           | Z           |    | X           | Y           | Z           |
| C      | 0.27961826  | -2.34901138 | 4.15614857  | C  | 1.80448689  | -1.44538529 | -9.01977294 |
| C      | 0.33639413  | -1.32549333 | 6.36570092  | C  | 3.73541633  | -1.33393362 | -3.7432206  |
| C      | -0.51968981 | -0.61390362 | 7.43911236  | C  | 1.63194038  | -0.93770312 | -2.7104001  |
| C      | -1.21451447 | -1.38806666 | 8.38299224  | C  | 0.17463711  | -3.94205621 | -3.84970497 |
| C      | -4.1497702  | 0.76578811  | 1.95142709  | C  | 1.7801728   | 2.69832298  | -8.35808652 |
| C      | -1.36425254 | 1.39934811  | 8.49800671  | C  | -1.704425   | 0.36772845  | -4.80507554 |
| C      | -3.60313491 | 1.21551963  | 3.30805995  | C  | 5.09894744  | -2.00382664 | -1.66794763 |
| C      | -1.42225664 | 0.95809244  | 2.35520915  | C  | 2.63265897  | 3.5340841   | -9.08930608 |
| C      | -0.16336901 | 3.69770813  | 2.99149963  | C  | -0.83666583 | -4.4391523  | -1.30567716 |
| C      | -1.14354872 | -2.78252176 | 8.32349827  | C  | -1.57311064 | -4.83281739 | -2.44220549 |
| C      | 1.88809892  | -0.41129861 | 4.02504713  | C  | 3.51265281  | 2.98653286  | 10.02995982 |
| C      | -4.93555757 | 1.61430933  | 1.17573002  | C  | -1.06910714 | -4.5697915  | -3.72736707 |
| C      | -1.7960534  | -3.56215115 | 9.28829687  | C  | 0.87217973  | 0.1634441   | -4.81405606 |
| C      | 0.32928919  | 5.14751903  | 0.65971678  | C  | -1.38662235 | 1.56472183  | -4.17518445 |
| C      | 1.3334482   | 5.0362542   | 1.63829047  | C  | 0.98120477  | -0.91169185 | -8.01638964 |
| C      | -2.53596629 | -2.94677362 | 10.30526511 | C  | 2.65609504  | 0.76695959  | -9.52988314 |
| C      | 1.08446564  | 4.31047857  | 2.81292669  | C  | 3.52648762  | 1.60179515  | 10.25022203 |
| C      | -0.60294387 | -0.16631929 | 4.48568322  | C  | -2.23873717 | 2.05418982  | -3.18380551 |
| C      | 1.62867302  | -1.7443034  | 3.73390818  | C  | 2.4140571   | -3.20454912 | -2.98544969 |
| C      | -0.60663752 | 0.78109464  | 7.49719031  | C  | 0.44357246  | -3.87851774 | -1.45407238 |
| C      | -1.96905582 | -0.77094912 | 9.38765724  | C  | 1.53709157  | 0.40593719  | -3.44125231 |
| C      | -2.63526967 | -1.55001928 | 10.34672022 | C  | 0.96766068  | -3.69627546 | -2.73847318 |
| C      | 2.59929015  | -2.48851421 | 3.05030053  | C  | 0.68904806  | -3.16888702 | -7.4164149  |
| C      | -2.50744585 | 3.09875587  | 2.26699129  | C  | -2.81555338 | -0.35012526 | -4.39080207 |
| C      | -0.91968268 | 4.54072983  | 0.86033472  | C  | 2.64282853  | -0.61037128 | -9.77005154 |
| C      | -1.26442454 | -0.37901524 | 3.11294735  | C  | 5.52917709  | -1.69440737 | -0.36650173 |
| C      | -1.15450655 | 3.79981456  | 2.0241325   | C  | 0.16143793  | -4.04276135 | -6.26622053 |
| C      | -0.55445855 | 2.86610888  | 6.53161019  | C  | -3.34195094 | 1.2745689   | -2.78388911 |
| C      | 3.0696358   | 0.16693786  | 3.57494032  | C  | 4.15232215  | 0.19764704  | -1.81212378 |
| C      | -2.05142879 | 0.62318063  | 9.43906684  | C  | -1.37746776 | -4.60955192 | -0.02235143 |
| C      | -5.28921656 | 1.21305996  | -0.11918041 | C  | 4.6055374   | 0.4516542   | -0.52271089 |
| C      | -0.05323803 | 3.65821337  | 5.3250965   | C  | -0.64081609 | -4.22679104 | 1.10683297  |
| C      | 3.77224698  | -1.84628732 | 2.60003449  | C  | 1.18972555  | -3.51828047 | -0.3249652  |
| C      | -3.8469764  | -0.50487553 | 1.46981651  | C  | 0.64717698  | -3.69178402 | 0.95617304  |
| C      | 0.5761189   | 5.86691534  | -0.51842742 | Cl | 5.90187683  | 1.95184485  | 2.25754099  |
| C      | -4.21712519 | -0.84618091 | 0.16972496  | Cl | 7.30782699  | -1.21436426 | 2.68026143  |
| C      | -0.43148183 | 6.00648115  | -1.47943868 | Cl | -5.23843742 | -2.52855277 | -2.6089764  |
| C      | -1.93033906 | 4.68627828  | -0.09837342 | Cl | -6.93688756 | 0.48427672  | -3.17858627 |
| C      | -1.68663495 | 5.42068321  | -1.26803975 | Co | 5.57907754  | -0.15645805 | 1.96250499  |

|   |             |             |             |    |             |             |             |
|---|-------------|-------------|-------------|----|-------------|-------------|-------------|
| C | -0.09959933 | 2.28564815  | -4.60045337 | Co | -5.14605458 | -0.39044689 | -2.38206622 |
| C | 0.00658934  | 1.21451699  | -6.79506102 | H  | -0.3374409  | -2.44711273 | 3.28239055  |
| C | 0.94730883  | 0.49607872  | -7.81044959 | H  | 0.44850373  | -3.30873003 | 4.59305904  |
| C | 1.79702207  | 1.3153393   | -8.57042198 | H  | 1.21724023  | -0.7541742  | 6.16031357  |
| C | 4.35476683  | -1.05500186 | -2.3724042  | H  | 0.61141328  | -2.28763232 | 6.74016365  |

---

In DMF

|   | x           | y           | z           |   | x           | Y           | z           |
|---|-------------|-------------|-------------|---|-------------|-------------|-------------|
| H | -1.4198563  | 2.46652918  | 8.538783    | H | -1.09689313 | 0.00469775  | -5.60164079 |
| H | -4.27935224 | 1.89620145  | 3.76971736  | H | 5.33142106  | -2.95180668 | -2.10903162 |
| H | -3.47267987 | 0.35877934  | 3.93945839  | H | 2.61116422  | 4.5918148   | -8.92706805 |
| H | -0.4597263  | 1.40891146  | 2.23085011  | H | -2.51577528 | -5.32910199 | -2.32534637 |
| H | -1.85343006 | 0.76064365  | 1.39562373  | H | 4.17311612  | 3.62248202  | 10.58219118 |
| H | -0.58743585 | -3.25233389 | 7.53948011  | H | -1.63365034 | -4.8294528  | -4.59769345 |
| H | 1.18582375  | 0.1639751   | 4.58699483  | H | -0.08544243 | -0.28618658 | -4.66621402 |
| H | -5.25650396 | 2.56353084  | 1.55793121  | H | 1.48364314  | -0.48427222 | -5.404679   |
| H | -1.72980758 | -4.6282166  | 9.24548775  | H | 4.202379    | 1.18110807  | 10.96629468 |
| H | 2.28374124  | 5.50698623  | 1.48763293  | H | -2.0513087  | 3.00533488  | -2.72535085 |
| H | -3.02488542 | -3.53950748 | 11.05089194 | H | 2.89022366  | -3.83720485 | -3.70261957 |
| H | 1.84142348  | 4.22138475  | 3.56346305  | H | 2.9623611   | -3.23115931 | -2.06771804 |
| H | 0.35346861  | 0.29142077  | 4.34486661  | H | 0.94493668  | 1.08349622  | -2.85938318 |
| H | -1.20888024 | 0.46432035  | 5.10210809  | H | 2.51182878  | 0.82186292  | -3.5840657  |
| H | -3.21808542 | -1.07748384 | 11.11132713 | H | 0.35098297  | -3.54314427 | -8.36209493 |
| H | 2.4479995   | -3.52729265 | 2.86484912  | H | 1.75770766  | -3.17950186 | -7.39376898 |
| H | -3.16146291 | 3.76425852  | 2.786681    | H | -3.06781648 | -1.26781455 | -4.88303429 |
| H | -2.93932228 | 2.83497081  | 1.32262893  | H | 3.27459534  | -1.02730847 | 10.52561859 |
| H | -0.6424232  | -1.02340948 | 2.52922026  | H | 6.0977358   | -2.40990813 | 0.19056244  |
| H | -2.22564405 | -0.82707893 | 3.24826323  | H | 0.48952842  | -5.0572636  | -6.36857715 |
| H | -0.3133008  | 3.38230262  | 7.43775395  | H | -0.90782783 | -4.02267404 | -6.25092254 |
| H | -1.61779679 | 2.75638109  | 6.45918232  | H | -3.99629192 | 1.62288975  | -2.006745   |
| H | 3.27701692  | 1.18873632  | 3.80770624  | H | 3.64647696  | 0.95977455  | -2.37006399 |
| H | -2.64151319 | 1.09685769  | 10.19597213 | H | -2.35473662 | -5.02868458 | 0.09410092  |
| H | -5.88503129 | 1.85309499  | -0.73299122 | H | 4.45457829  | 1.41780164  | -0.08693652 |
| H | -0.48557128 | 4.63729572  | 5.32862731  | H | -1.05888372 | -4.35066545 | 2.08382478  |
| H | 1.01487343  | 3.74535607  | 5.35353483  | H | 2.17293546  | -3.11136702 | -0.4364625  |
| H | 4.51761966  | -2.40269832 | 2.06114512  | H | 1.21336329  | -3.41242725 | 1.82203989  |
| H | -3.32670136 | -1.20804116 | 2.08642689  | N | -0.42680714 | -1.48346207 | 5.11933985  |
| H | 1.53609555  | 6.31168899  | -0.6809113  | N | -2.30788133 | 1.87451836  | 3.08564747  |
| H | -3.96598295 | -1.81397149 | -0.21950172 | N | -4.86945147 | 0.03380694  | -0.60039419 |
| H | -0.24101624 | 6.55529     | -2.37415355 | N | 3.94551188  | -0.53094483 | 2.84106278  |
| H | -2.88702892 | 4.23633831  | 0.06059684  | N | 0.69080158  | 1.43699794  | -5.50478732 |
| H | -2.46117945 | 5.53661931  | -1.99749468 | N | 2.37328099  | -1.85742244 | -3.56020955 |
| H | 0.485405    | 2.4796173   | -3.72412523 | N | 5.21438127  | -0.50778716 | 0.18409602  |
| H | -0.34047487 | 3.21215684  | -5.08210615 | N | -3.57021869 | 0.08502882  | -3.37312108 |

|   |             |             |             |   |             |             |             |
|---|-------------|-------------|-------------|---|-------------|-------------|-------------|
| H | -0.87636719 | 0.63379938  | -6.63801275 | O | 0.06248192  | 1.58109998  | 6.5333781   |
| H | -0.25664739 | 2.16713636  | -7.20543677 | O | -0.46846858 | 2.96042826  | 4.15916545  |
| H | 1.79402596  | -2.49687714 | -9.20797127 | O | 0.20663949  | -1.816791   | -7.2235424  |
| H | 4.3229724   | -2.04364686 | -4.28233747 | O | 0.69136868  | -3.47025142 | -5.08591985 |
| H | 3.68959398  | -0.41871591 | -4.29183778 | H | -1.09689313 | 0.00469775  | -5.60164079 |
| H | 0.64874056  | -1.32344733 | -2.54219097 | H | 5.33142106  | -2.95180668 | -2.10903162 |
| H | 2.12911573  | -0.81588678 | -1.77151932 | H | 2.61116422  | 4.5918148   | -8.92706805 |
| H | 1.11423217  | 3.11572096  | -7.63397637 | H | -2.51577528 | -5.32910199 | -2.32534637 |

**Table S8.** Relative energy of existing van der Waals interactions in crystal structure of  $\text{Co}_2(\mathbf{2py})_2\text{Cl}_4$

| Name                                     | Interaction Type          | Distance (Å) | Relative Energy (kcal mol <sup>-1</sup> ) |
|------------------------------------------|---------------------------|--------------|-------------------------------------------|
| $\text{Co}_2(\mathbf{2py})_2\text{Cl}_4$ | $\pi$ - $\pi$ Interaction | 4.349        | 2.593                                     |
|                                          | H- $\pi$ Interaction      | 2.748        | 6.361                                     |
|                                          | H- $\pi$ Interaction      | 2.968        | 4.932                                     |

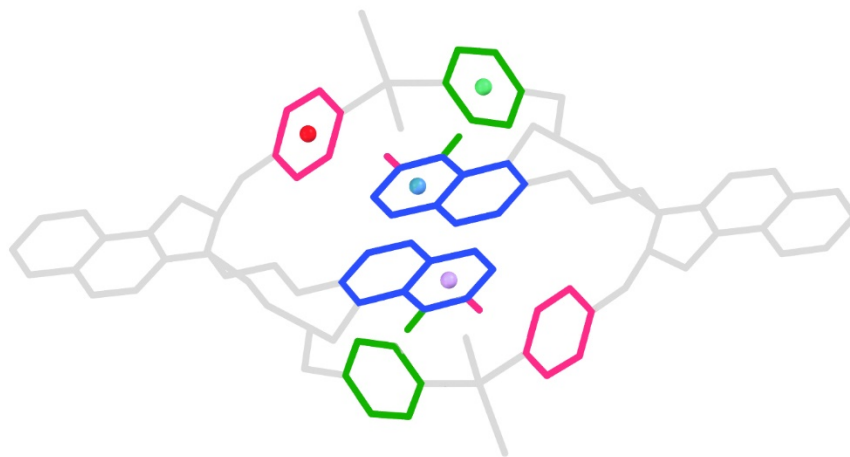

**Figure S22** Schematic representation of existing van Der Waals interactions in the crystal structure of  $\text{Co}_2(\mathbf{2py})_2\text{Cl}_4$ ,  $\pi$ - $\pi$  interaction (blue), H- $\pi$  interaction-face (green), and H- $\pi$  interaction-side (pink). Hydrogens were removed for clarity



**Table S9** Relative energies of different conformations relative to the crystal structure of  $\text{Co}_2(\mathbf{2py})_2\text{Cl}_4$ 

| Conformation      | Relative energy<br>(kcal mol <sup>-1</sup> ) |
|-------------------|----------------------------------------------|
| 1                 | 0                                            |
| 2                 | 24.066                                       |
| 3                 | 24.268                                       |
| 4                 | 24.504                                       |
| 5                 | 24.581                                       |
| Crystal structure | 0                                            |
| in DMF            | 14.798                                       |

**Table S10** Some selected bond lengths [Å], distances [Å], and angles [°] for  $\text{Co}_2(\mathbf{2py})_2\text{Cl}_4$ 

| Parameter                           | Distance |          | Parameter                            | Angle  |          |
|-------------------------------------|----------|----------|--------------------------------------|--------|----------|
|                                     | Solid    | Solution |                                      | Solid  | Solution |
| Co ... Co                           | 12.127   | 13.574   | py <sub>1</sub> -Co- py <sub>2</sub> | 104.08 | 103.81   |
| naph ... naph                       | 4.348    | 7.778    | py <sub>3</sub> -Co- py <sub>4</sub> | 104.08 | 108.48   |
| py <sub>1</sub> ... py <sub>3</sub> | 9.383    | 8.771    | naph ... naph                        | 0.5    | 13.04    |
| py <sub>2</sub> ... py <sub>4</sub> | 8.022    | 8.113    |                                      |        |          |

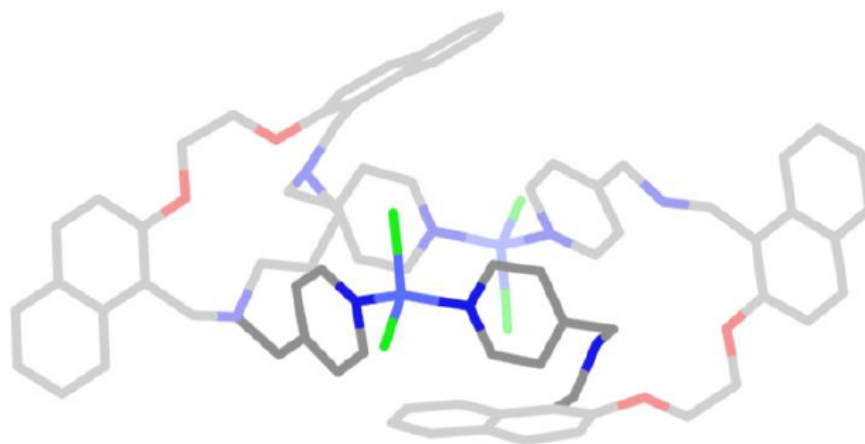**Figure S23** Molecular view of the optimized ground state geometry of  $\text{Co}_2(\mathbf{2py})_2\text{Cl}_4$  in DMF

**Table S11** Relative energy of different conformations relative to the optimized structure

| Conformation        | Relative energy<br>(kcal mol <sup>-1</sup> ) |
|---------------------|----------------------------------------------|
| optimized structure | 0                                            |
| <i>o</i> -xylene    | 12.451                                       |
| <i>m</i> -xylene    | 18.533                                       |
| <i>p</i> -xylene    | N.A.                                         |

**Table S12** The orbital contribution excitation of Co<sub>2</sub>(**2py**)<sub>2</sub>Cl<sub>4</sub> in gas state

| From    | To     | Contribution |       |
|---------|--------|--------------|-------|
| SHOMO   | LUMO   | 0.388318     | 39.0% |
| SHOMO-1 | LUMO+1 | 0.402401     | 40.2% |

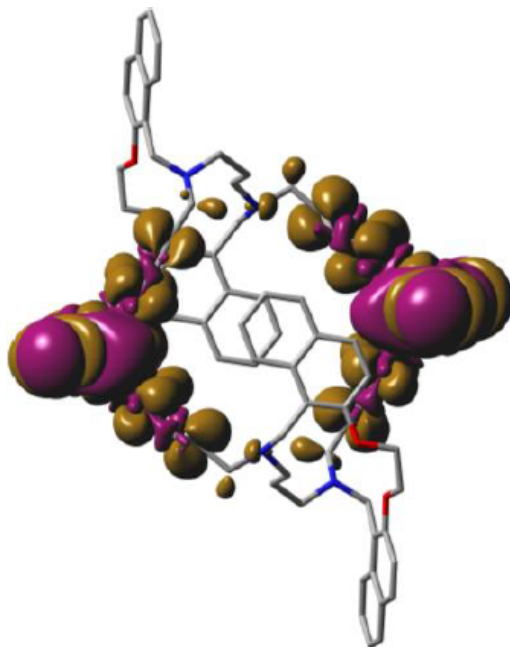

**Figure S24** PBE0-DFT transition densities for  $\text{Co}_2(\mathbf{2py})_2\text{Cl}_4$ . During the electronic transition, the electron density increases the violet areas and decreases in the brown areas

**Table S13** Comparison of the computational and experimental optical data

| $\text{Co}_2(\mathbf{2py})_2\text{Cl}_4$ | Excitation ( $\lambda_{ex}$ ) |     | Emission ( $\lambda_{em}$ ) |     |
|------------------------------------------|-------------------------------|-----|-----------------------------|-----|
|                                          | theor                         | exp | theor                       | exp |
|                                          | 332                           | 340 | 439                         | 456 |
